1 **Diversity and biogeography of SAR11 bacteria from the Arctic Ocean**

2

3 Susanne Kraemer<sup>1</sup>, Arthi Ramachandran<sup>1</sup>, David Colatriano<sup>1</sup>, Connie Lovejoy<sup>2</sup>, and David A.

4 Walsh<sup>1\*</sup>

5

6 <sup>1</sup> Department of Biology, Concordia University, 7141 Sherbrooke St. West, Montreal, Quebec

7 H4B 1R6, Canada

8 <sup>2</sup> Département de biologie, Institut de Biologie Intégrative et des Systèmes (IBIS) and Québec-

9 Océan, Université Laval, Québec, G1K 7P4, Canada

10

11

12 \*Corresponding author: Phone: (514) 848-2424 (ext. 3477)

13 E-mail: [david.walsh@concordia.ca](mailto:david.walsh@concordia.ca)

14

15

16 Key words: ITS phylogeny, metagenome assembled genomes, ecotype, evolution

17

18 **Abstract**

19           The Arctic Ocean is relatively isolated from other oceans and consists of strongly  
20 stratified water masses with distinct histories, nutrient, temperature and salinity characteristics,  
21 therefore providing an optimal environment to investigate local adaptation. The globally  
22 distributed SAR11 bacterial group consists of multiple ecotypes that are associated with  
23 particular marine environments, yet relatively little is known about Arctic SAR11 diversity. Here,  
24 we examined SAR11 diversity using ITS analysis and metagenome-assembled genomes  
25 (MAGs). Arctic SAR11 assemblages were comprised of the S1a, S1b, S2, and S3 clades, and  
26 structured by water mass and depth. The fresher surface layer was dominated by an ecotype  
27 (S3-derived P3.2) previously associated with Arctic and brackish water. In contrast, deeper  
28 waters of Pacific origin were dominated by the P2.3 ecotype of the S2 clade, within which we  
29 identified a novel subdivision (P2.3s1) that was rare outside the Arctic Ocean. Arctic S2-derived  
30 SAR11 MAGs were restricted to high latitudes and included MAGs related to the recently  
31 defined S2b subclade, a finding consistent with bi-polar ecotypes and showing the potential for  
32 Arctic endemism. These results place the stratified Arctic Ocean into the SAR11 global  
33 biogeography and have identified SAR11 lineages for future investigation of adaptive evolution  
34 in the Arctic Ocean.

35

## 36 Introduction

37 The SAR11 (Pelagibacterales) group accounts for roughly 30% of bacteria in the ocean  
38 surface and 25% of mesopelagic bacteria [1–3]. High phylogenetic diversity and divergence into  
39 ecological lineages (i.e. ecotypes) of SAR11 tends to mirror distinct conditions in the oceanic  
40 environment [2, 4–6]. SAR11 are classified into clades and subclades based on 16S rRNA  
41 genes and further classified into phylotypes based on rRNA internal transcribed spacers (ITS)  
42 (Table 1). Three major SAR11 clades (S1, S2 and S3) are currently recognized, with several  
43 subclades defined within S1 (S1a, S1b, S1c). Within this diversity approximately 12 phylotypes  
44 have been described [2, 5]. To date, many of the phylotypes are thought to have restricted  
45 distributions. For example, there are three phylotypes in subclade S1a: P1a.1 is associated with  
46 cold environments [2], while P1a.2 and P1a.3 are associated with temperate and tropical  
47 environments, respectively [2, 5]. Subclade S1b is generally associated with tropical  
48 environments [2, 5, 7], while subclade S1c is associated with deep marine samples [5].  
49 Recently, the clade S2 was divided into subclades S2a and S2b. The S2a subclade is further  
50 divided into an oxygen minimum zone subclade (S2a.a) and a tropical subclade (S2a.b) [7]. The  
51 S2 subclade phylotypes have been further divided by environment. P2.1, is associated with  
52 tropical environments [2], P2.2 is reported from cold, especially Antarctic, waters [2, 8], and the  
53 P2.3 phylotype is more ambiguous; associated with both cold waters and tropical deep-sea  
54 environments [2, 5]. To date, three phylotypes have been distinguished for clade S3; P3.1 is  
55 associated with coastal, mesohaline surface [9] and tropical samples [2], P3.2 is found in  
56 brackish [9], temperate [2], as well as Arctic samples [10] and the third S3 phylotype, LD12, is  
57 found in freshwater [11] (Table 1).

58 The Arctic Ocean is small, geographically isolated, and more influenced by freshwater  
59 and ice compared to other oceans [12–14]. These distinct characteristics would favour the  
60 evolution of locally adapted microbial assemblages, however evidence for this is difficult to  
61 document. Biogeographic patterns of taxa reported from the Arctic vary, with reports of

62 cosmopolitan, bi-polar and endemic species, suggesting a potential for different levels of  
63 specialization to local conditions [6, 15–17]. Although SAR11 are reported widely and account  
64 for 25 to 30% of Arctic Ocean bacterial assemblages [18, 19], comparatively little information  
65 exists on Arctic SAR11 diversity [2]. The extensive knowledge of SAR11 diversity and ecology  
66 in other oceans makes it an attractive clade to investigate the potential for ecotypes adapted to  
67 Arctic Ocean conditions. The objective of this study was to place SAR11 from the Arctic Ocean  
68 within a global context using ITS phylogenetic analysis and comparative genomics using  
69 metagenome-assembled genomes (MAGs). We then examined the distribution of SAR11 along  
70 a latitudinal transect of the stratified waters of the Canada Basin in the western Arctic Ocean.  
71 We targeted three water masses in the upper 200 m, the surface layer, the deep chlorophyll  
72 maximum (DCM), which corresponds to a halocline formed by Pacific Summer Water, and the  
73 Pacific Winter Water (PWW) layer [20]. These three water masses were previously found to  
74 have distinct microbial communities [21] and we hypothesised that different SAR11 ecotypes  
75 would be favored within them.

76

77

## 78 **Methods**

### 79 **Sampling and metagenomic data generation**

80 Samples were collected aboard the Canadian Coast Guard Icebreaker CCGS Louis S.  
81 St-Laurent from the Western Arctic Ocean from latitudes 73° to 79° N in October 2015, during  
82 the Joint Ocean Ice Study cruise in the Canada Basin (Table 2). Sample collection and  
83 preservation, DNA extraction, and metagenomic data generation were as described previously  
84 [22], and further details given in the Supplementary Information. The metagenomic data is  
85 deposited in the Integrated Microbial Genomes database at the Joint Genome Institute at  
86 <https://img.jgi.doe.gov>, GOLD project ID Ga0133547.

87

## 88 **ITS phylogenetic analysis**

89 SAR11 ITS sequences were retrieved from twelve assembled metagenomes, clustered  
90 and filtered (Supplementary information). We combined the Arctic ITS sequences with reference  
91 sequences from SAR11 genomes and ITS sequences from two previous biogeographic studies  
92 [2, 5] and assigned Arctic ITS sequences to phylotypes. We determined phylotype distribution  
93 across the samples with PCoA ordination of the Bray-Curtis dissimilarity as described in the  
94 Supplementary Information.

95

## 96 **Metagenome-assembled genomes**

97 We conducted metagenomic binning using the Metabat2 pipeline [23] on a 12 sample  
98 coassembly [22, 24]. Further SAR11 bin filtering and cleaning was conducted as described in  
99 the Supplementary Information. Seven SAR11 MAGs with low contamination values (<4%) and  
100 relatively high completeness values estimated using CheckM [25] (36 % to 47%) were selected  
101 for further analysis (Table 3) (Genbank accession numbers XXX). The distribution of orthologs  
102 across SAR11 MAGs and reference genomes was analyzed with ProteinOrtho [26]. A set of 39  
103 single copy ortholog genes were concatenated and used for phylogenetic analysis using MEGA-  
104 cc with a JTT substitution model [27], as further described in the Supplementary Information.

105

## 106 **Comparative genome content, average nucleotide identity and signatures of selection of** 107 **Arctic MAGs**

108 To identify Arctic-specific SAR11 genes, we compared all genes within the Arctic MAGs  
109 to those found within 41 SAR11 reference genomes using ProteinOrtho [26]. The protein  
110 functions of genes only found in Arctic MAGs were retrieved following the IMG annotation [28]  
111 or the SwissProt database [29]. We calculated average nucleotide identity (ANI) between Arctic

112 MAGs and reference genomes representing the different subgroups following the method  
113 implemented within IMG [28].

114

### 115 **Fragment recruitment and SAR11 biogeography.**

116 To determine the prevalence of Arctic MAGs across global marine biomes, we  
117 performed reciprocal best hit analysis [22, 30] for 168 metagenomic samples from a range of  
118 marine biomes. Metagenomic datasets included 134 TARA ocean datasets [31] which were  
119 randomly sub-sampled to a size of approximately 1 GB of reads each to facilitate analysis.  
120 These were added to the Arctic metagenomes and 22 Antarctic datasets that included 20  
121 marine and 2 ACE lake samples [2]. We examined the distribution of the seven Arctic MAGs, 48  
122 representative SAR11 reference genomes, and 38 TARA ocean MAGs previously described as  
123 SAR11 [32] as described in the Supplemental Information. Best hits from the reciprocal blast  
124 were filtered to a minimum length of 100 bp and a minimum identity of 98% and the number of  
125 recorded hits per reference genome and metagenomic sample were used to calculate the  
126 number of reads recruited per megabase genome per gigabase metagenome (RPMG). See  
127 Supplemental Table 1 for all metagenomic datasets and reference genomes.

128 We utilized the RPMG matrix for PCoA ordination of the Bray-Curtis dissimilarity of the  
129 RPMG matrix. The envdust function as implemented in vegan with 999 permutations was used  
130 for *Post-Hoc* tests of environmental variables. [33].

131

## 132 **Results**

### 133 **Environmental setting**

134 The stratified upper waters of the Canada Basin in the Western Arctic Ocean sampled  
135 during the late summer–autumn of 2015 were typical for the region, with warmer and fresher  
136 summer waters above colder slightly saltier winter Pacific-origin water (Table 2). Salinity at the  
137 surface ranged from 25.6-27.3 and nitrate concentrations were below the detection limit (0.5

138  $\mu\text{M}$ ). Below the surface water, relative chlorophyll *a* fluorescence at the DCM was calculated to  
139 range from 0.23 to 0.33  $\text{mg m}^{-3}$ . The DCM depth varied from 25-79 m, with the shallowest value  
140 at CB11, the most northerly station along the western edge of the Canada Basin (Figure 1A-B).  
141 Nitrate concentrations increased with depth to up to 16  $\text{mg m}^{-3}$  in the PWW, where chlorophyll *a*  
142 was low (0.05  $\mu\text{mol m}^{-3}$ ).

143

#### 144 **SAR11 ITS sequence diversity**

145 No SAR11 16S rRNA sequences were present in the metagenomes. Within the  
146 metagenomic assemblies, we identified 140 high quality SAR11 ITS sequences which were  
147 clustered into 111 unique ITS sequence variants (SVs) and combined these SVs with previously  
148 published sequences for phylogenetic analysis. Sixty Arctic ITS SVs did not cover the full ITS  
149 region and were assigned to phylotypes using their best BLAST hit against full-length SAR11  
150 ITS SVs. In total, 6 distinct phylotypes were evident from ITS SVs (Figure 1C), from all major  
151 clades S1, S2, and S3 (Figure 1C, Supplemental Figure 1A-D).

152 **Clade S1.** Within S1, we identified the S1a and S1b subclades. The Arctic ITS S1a SVs  
153 mostly clustered apart from previously published P1a SVs (Supplemental Figure 1A). These  
154 P1a-related SVs were common in samples from the PWW and DCM layer, but nearly absent  
155 from the surface layer (Supplemental Figure 1A, Figure 2A). Within subclade S1b  
156 (Supplemental Figure 1B), Arctic Ocean ITS SVs were found in two clusters. One cluster  
157 corresponded to a previously described P1b.a group [2], while the other grouped within a  
158 previously designated non-monophyletic tropical P1b cluster [2], hereafter termed P1b.b  
159 (Supplemental Figure 1B), but we were unable to connect these groupings to the three  
160 previously described P1b.1-3 phylotypes [5]. P1b.a contained three full-length Arctic SVs and  
161 was found nearly exclusively in the PWW (Supplemental Figure 1B, Figure 2A).

162 **Clade S2.** The majority of ITS SVs were assigned to phylotypes within subclade S2  
163 (Supplemental Figure 1C). In our phylogenetic analysis, we recovered a monophyletic group

164 within the P2.3 phylotype, with Arctic SVs clustering with two deep water Red Sea SVs, forming  
165 a novel cluster P2.3s1 (Figure 1C, Supplemental Figure 1C). Apart from a single DCM sample,  
166 which contained a high number of P1a sequences (coverage of ~670, compared to an average  
167 coverage of ~40, Fig. 2A), SVs within the P2.3s1 phylotype were the most frequently detected in  
168 Arctic waters, specifically in DCM and PWW samples (Supplemental Figure 1C, Figure 2A). The  
169 published ITS SVs previously assigned to P2.1 and P2.2 were interspersed with one another,  
170 and we therefore refer to this subgroup as P2.1–2.2. P2.1–2.2 was distributed relatively evenly  
171 across sampling depths and locations (Supplemental Figure 1C, Figure 2A).

172 **Clade S3.** We recovered two ITS SVs belonging to the brackish Arctic phylotype P3.2  
173 (Supplemental Figure 1D). P3.2 was common in the less saline surface water samples and  
174 absent below the DCM (Supplemental Figure 1D, Figure 2A).

#### 175 176 **Phylotype abundance and biogeography**

177 PCoA ordination of samples based on the relative abundance of phylotypes showed that  
178 SAR11 assemblages were structured along the first axis in relation to the water layer sampled  
179 (Figure 2B). The second axis had less explanatory power and assemblage structuring was  
180 mostly driven by the highly abundant P1a SV in the DCM sample of station CB8. PWW samples  
181 contained a high contribution of diverse phylotypes including P1a, P1b.a, P1b, P2.1–P2.2 and  
182 P2.3 and P2.3s1, while P3.2 was most frequent in surface layer samples. P2.1–P2.2, was not  
183 associated with contributions to a specific depth class of samples likely because multiple poorly  
184 resolved ecotypes are contained within this group (Figure 2A, B). Secondary fitting of  
185 environmental variables onto the ordination did not yield significant results.

186

#### 187 **Characteristics of Arctic Ocean SAR11 MAGs**

188 We binned SAR11 scaffolds from the Arctic Ocean metagenome co-assembly based on  
189 tetranucleotide frequency and coverage across samples. After automated binning and manual



190 curation, we selected seven high quality SAR11 MAGs for further analysis (Table 3). Quality  
191 was based on high N50 values (19-100Kb), a low number of scaffolds (5-26), relatively high  
192 completeness (35-47%), and low contamination (0-4%) values (except for 'completeness'  
193 following [34]).

194 While SAR11 ITS sequences were abundant in the metagenomic dataset, none were  
195 present in the SAR11 MAGs. Moreover, SAR11 MAGs did not contain rRNA genes and thus  
196 their placement into 16S rRNA or ITS-based phylogenies was not possible. Instead we  
197 investigated their phylogeny using a concatenated gene tree of Arctic MAGs, reference  
198 genomes, and SAGs from the Red Sea and the Eastern Tropical North Pacific oxygen minimum  
199 zone (ETNP OMZ) [7] (Figure 3A). The Arctic MAG SAR11-312 belonged to subclade S1a and  
200 was prevalent at and below the DCM layer, but not at the surface (Figure 3B). This MAG was  
201 more closely related to phylotype P1a.1 than to P1a.3; a placement supported by its maximum  
202 ANI value in comparison to a P1a.1 reference genome (80%). Its phylotype could not be  
203 determined, as no closely related reference genome contained ITS sequences.

204 The remaining six MAGs were members of the S2 clade of SAR11. Four of the MAGs  
205 (SAR11-112, SAR11-272, SAR11-410, and SAR11-484) were members of the S2a subclade,  
206 while two (SAR11-144 and SAR11-196) were most closely related to two SAGs from the S2b  
207 subclade that originated from the ETNP OMZ (Figure 3A). The S2a MAGs exhibited differential  
208 distributions in the stratified waters of the Arctic Ocean. Three closely related MAGs (SAR11-  
209 112, SAR11-272, SAR11-410) were detected at all depths, while a more distantly related S2a  
210 MAG (SAR11-484) was only detected in the surface and DCM samples (Figure 3B). The  
211 phylogenetic placement of these MAGs was supported by their maximum ANI values in  
212 comparison to the S2a reference genome HIMB058 (>75%). In contrast, MAGs SAR11-144  
213 and SAR11-196 were detected in DCM and PWW samples (Figure 3B), and are the most likely  
214 MAGs to represent the novel P2.3s1 phylotype defined in this study. However, as S2b reference  
215 genomes lack ITS sequences, we were unable to directly confirm that subclade S2b MAGs

216 belong to the P2.3 phylotype. Due to the absence of any S2b reference genomes with high  
217 completeness, we were unable to calculate ANI of SAR11–144 and SAR11–196 with S2b.

218

### 219 **Comparison of gene content**

220 To investigate the potential of local adaptation through variation in gene content we  
221 identified SAR11 genes specific to the Arctic Ocean by comparing the distribution of orthologs  
222 between Arctic MAGs and 60 reference genomes representing the known phylogenetic diversity  
223 of SAR11. Of the 2 648 orthologs we identified across SAR11 genomes, 233 were only found in  
224 Arctic MAGs and four of these were present in more than one MAG. The majority of these  
225 orthologs were poorly characterized proteins (58%, 136 orthologs: COG categories S and R). A  
226 further 24% (55 orthologs) were involved in metabolism, 3% (7 orthologs) in cellular processes  
227 and signaling and 7% (16 orthologs) in information storage and processing (Supp. Table 3).

228

### 229 **Global biogeography of SAR11 genomes**

230 We investigated the biogeographic distribution of Arctic SAR11 populations using Arctic  
231 MAGs and available SAR11 genomes. In addition to being present in Arctic DCM and PWW  
232 samples, MAG SAR11–312, belonging to subclade S1a, was also detected in the mesopelagic  
233 zone of colder oceans (Figure 4A). Arctic S2a MAGs were present in metagenomic datasets  
234 that were mostly from polar regions, with the exception of SAR11–112 and SAR11–272, which  
235 were present in Mediterranean samples. The Arctic MAGs most closely related to the S2b  
236 subclade were even more narrowly distributed. Outside of Arctic samples, SAR11–144 was only  
237 detected in South Atlantic DCM layer and North Atlantic mesopelagic samples. In contrast, MAG  
238 SAR11–196 was only found in Arctic DCM and PWW samples (Figure 4A).

239 Other than the Arctic MAGs, most SAR11 genomes recruited poorly across both Arctic  
240 and Antarctic metagenomic samples, suggesting they are not significant members of Arctic  
241 SAR11 assemblages. However, there were some exceptions: S1a genome HTCC1062, which

242 was the most widely distributed genome, was prevalent in the Antarctic and to a lesser degree  
243 the Arctic. The generalist S2a genome HIMB058, which is prevalent in most marine biomes,  
244 was present in Arctic and Antarctic samples (Figure 4A). Lastly, S3 genome IMCC9063,  
245 characterized as a fresher, arctic phylotype [9], was found across surface samples of several  
246 marine biomes, but was most prevalent in Arctic surface waters, followed by Antarctic samples.

247 To further explore SAR11 biogeography in relation to environmental conditions of ocean  
248 biomes, we performed PCoA ordination of the Bray-Curtis distance matrix of the RPMG-values  
249 (Figure 4B). Overall, metagenomic samples clustered according to their biome and sampling  
250 depth. Along the first axis, samples separated according to a temperature and salinity gradient,  
251 with colder, fresher samples such as the Arctic and Antarctic environments investigated here  
252 distinguished from warmer, saltier environments. Along the second axis, metagenomic samples  
253 were separated according to their depth. Deep samples were characterized by high nitrate  
254 concentrations while more shallow samples had higher oxygen and Chl *a* concentrations.  
255 Notably, Arctic and Antarctic surface and Arctic PWW samples clustered together (Figure 4B, as  
256 polar biome samples in lower left quadrant) while Arctic DCM samples were clearly distinct in  
257 their compositions (Figure 4B, blue circles). S1a MAG SAR11–312 had a vastly different  
258 distribution compared to most other S1a genomes, which were found largely in warmer coastal  
259 and trades biomes (e.g. RS39, HIMB5, HIMB083). Arctic S2a MAGs were associated with Arctic  
260 PWW and polar surface samples. MAGs SAR11–144 and 196 were differentially distributed  
261 from all other genomes investigated here, including the most closely related North Pacific A6S6  
262 and B3S13. These results were robust to expanding the analysis to MAGs assembled from the  
263 initial TARA Oceans project, which did not include Arctic samples (Supp. Figure 2).

## 264 **Discussion**

266 Ribosomal RNA amplicon surveys of the marine environment have documented the  
267 occurrence of SAR11 in Arctic marine systems [35–37], but the diversity and biogeography of

268 the different lineages has not been investigated in detail. Here we found evidence for the  
269 presence of at least six SAR11 phylotypes in the Arctic. The global success of the SAR11 group  
270 across marine environments points to a capacity to adapt to a wide array of environmental  
271 conditions. While Arctic and Antarctic Oceans are superficially similar environments with respect  
272 to solar radiation, the presence of sea ice and algae blooms following ice melt in spring [17], the  
273 Arctic Ocean is surrounded by land and freshwater input from large rivers makes the Arctic  
274 Ocean a more estuary-like marine biome compared to the Antarctic. The rivers also bring in  
275 terrestrial-derived organic matter which represents a potential substrate and selective force on  
276 the bacterial communities [22]. Increasing evidence suggests microbial Arctic endemism in  
277 other bacterial groups [22], but this is the first genome-level study to our knowledge within the  
278 SAR11 group.

279         The biogeography of ITS phylotypes offers a hint that local selective forces are at work  
280 but the relatively coarse nature of the marker masks potential differentiation at the genome  
281 level, such that ITS-based phylotypes may not necessarily discern discrete bacterial populations  
282 that are locally adapted. Recent advances in sequencing techniques and genome assembly  
283 algorithms have resulted in the utilization of MAGs and SAGs to extend the biogeographies of  
284 bacteria beyond the phylogenetic marker level and infer patterns of local adaptation at the  
285 genome level [7, 23, 38]. Utilizing this approach, gene content of individual SAR11 genomes  
286 has been linked to niche partitioning based on nutrients [39], metabolic adaptation to  
287 environmental productivity [40] and oxygen minimum zones [7]. However, this approach may  
288 have limitations since assembling SAR11 genomes from metagenomes is notoriously difficult  
289 due to their high levels of polymorphism [41]. Moreover, recent work suggests that gene content  
290 differences alone may not be sufficient to explain SAR11 biogeographic patterns [42].  
291 Nonetheless, our combined MAG-based and marker gene-based results converged, providing  
292 support for the existence of novel arctic ecotypes.

293

## 294 **Structure of Arctic Ocean SAR11 assemblages**

295 Arctic phylotypes belonging to S1a, S2 and S3 showed preferences linked to different  
296 water masses [5]. The fresher Arctic surface waters were dominated by a P3.2 phylotype that  
297 had been previously associated with Arctic and brackish waters [9, 10]. In contrast, PWW  
298 depths were dominated by the cold [2] and deep [5] phylotype P2.3. The majority of all  
299 recovered ITS phylotypes from the Arctic Ocean belonged to the P2.3 phylotype, with one highly  
300 abundant phylotype (P2.3s1, Figure 1C) that was previously only represented by a few  
301 sequences from deep in the Red Sea [5]. The Arctic Ocean may constitute the centre of the  
302 P2.3s1 range distribution [43] and its potential for local adaptation as well as its niche  
303 requirements needs further exploration. In contrast to P3.2 and P2.3, the P2.1–P2.2 phylotype  
304 showed a broader distribution across depths and samples. However, our phylogenetic analyses  
305 failed to recover the two distinct previously published phylotypes P2.1 (tropical) and P2.2 (cold)  
306 [2].

307 To further investigate the link between SAR11 diversity and the environment we utilized  
308 metagenomic binning to assemble seven Arctic Ocean SAR11 MAGs that belonged to or were  
309 closely related to subclades S1a and S2a and S2b, and investigated their biogeographic  
310 distribution and transcriptional activity in the Arctic Ocean. Three of the four S2a MAGs  
311 recovered here were widely distributed across depth classes and most stringently corresponded  
312 to the distribution of the P2.1–P2.2 phylotype. The two MAGs most closely related to S2b  
313 reference genomes were mostly present in DCM and PWW waters, mirroring the distribution of  
314 the P2.3 and P2.3s1 phylotypes. However, in the absence of direct ITS evidence we were  
315 unable to test directly that S2b-related Arctic MAGs correspond to the extremely common  
316 P2.3s1 ITS phylotype. Surprisingly, we failed to assemble a S3 MAG, which based on the  
317 abundance of corresponding ITS sequences, the high fragment recruitment of the S3 reference  
318 genome IMCC9063, should have been recoverable. Moreover, we were unable to detect any

319 long (>10 kb) SAR11 scaffolds mapping to S3. The absence of any other strong S3 signal, apart  
320 from the presence of ITS sequences, is intriguing and warrants further investigation.

321

### 322 **Placing Arctic SAR11 into the global biogeography**

323 To determine the biogeography of Arctic MAGs, in comparison to reference genomes  
324 representing SAR11 diversity, we performed fragment recruitment analysis across 168  
325 metagenomic datasets from different marine biomes, including the Arctic and two Antarctic  
326 habitats: the Southern Ocean and Ace Lake, a saline Antarctic lake. While Arctic MAGs  
327 belonging to clade S1 and subclade S2a were also detected in other metagenomic samples,  
328 one MAG, which was most closely related to subclade S2b, SAR11–196, was found only in  
329 samples from the Arctic Ocean, providing support for the presence of endemic arctic SAR11.  
330 However, due to the low genome completeness of this MAG and the lack of closely related  
331 reference genomes it was not feasible to link this potential endemism to gene content [7, 40] or  
332 selection acting on genes responsible for the apparent local adaptation to the Arctic, as was  
333 recently done for a different and wide-spread SAR11 population [42].

334 Arctic S2a MAGs were sparsely distributed across global metagenomes but were  
335 consistently found in Arctic, Antarctic and South Atlantic biomes, indicating a bi-polar distribution  
336 of this subclade. However, two of the three MAGs showed recruitment to the warm and salty  
337 Mediterranean Sea in both the surface and the DCM layer. Other reference genomes within the  
338 subclade were isolated from warm and oxygen-poor environments (e.g. A6S6 and A10S10 [7]),  
339 indicating that cross-binning across closely related genomes during the fragment recruitment is  
340 theoretically possible. Lastly, in contrast to the majority of other S1a reference genomes  
341 investigated, the Arctic S1a MAG SAR11–312 was found across the mesopelagic layer of most  
342 Oceans.

343 It has been discussed whether SAR11 diversity is shaped by neutral evolution [44], or  
344 whether the multitude of subclades found within SAR11 represent ecotypes adapted to local

345 environmental conditions (e.g. [45]). Hellweger and colleagues [44] found that distinct  
346 populations characterized by up to 0.5% diversity (roughly corresponding, for example, to the  
347 rRNA gene diversity between phylotypes P1a.1 and P1a.3 [45]) can arise neutrally. However, a  
348 range of other studies [1, 4, 46] have described seasonal and spatial patterning consistent with  
349 adaptation to environmental conditions and colonization of environmental niches. Consistent  
350 with ecotype adaptations to local conditions, we found that SAR11 assemblages within the  
351 metagenomic datasets to be structured by both their biomes and environmental features. This  
352 finding, in correspondence with the fact that diversity between most SAR11 subclades and  
353 phylotypes is higher than 0.5% [2, 5], indicates that the majority of diversity within the clade is  
354 likely to be shaped by adaptation to environmental niches.

355         The majority of SAR11 reference genomes (including most S1a and S1b genomes), as  
356 well as MAGs assembled from the global TARA ocean metagenomes [31], are associated with  
357 metagenomic datasets from warmer, more shallow environments from the Trades, Coastal and  
358 Westerlies Biomes. A second group of reference genomes (mostly S1c) were most common in  
359 deeper water metagenomic datasets with lower oxygen and higher nitrate concentrations, as  
360 previously reported for S1c genotypes found in nitrate replete oceanic OMZs [7]. Polar biome  
361 metagenomic datasets formed a distinct third environmental group. Within the polar datasets,  
362 those from the DCM clustered away from all other environments, providing support for the  
363 hypothesis that distinct SAR11 assemblages in the samples are selected by environmental  
364 conditions, specifically with respect to the Arctic S2a MAGs, which were most frequent here. In  
365 contrast to DCM metagenomic datasets, other Arctic datasets clustered closely with those from  
366 the Southern Ocean, pointing towards the bi-polar distribution for several of the Arctic S2 MAGs  
367 found in these datasets.

368         Seasonal variability of SAR11 phylotypes in association with mixing and phytoplankton  
369 bloom events has been extensively described at the Bermuda Atlantic Time-series Study  
370 (BATS) site in the Sargasso Sea [4, 46] as well as at coastal environments [45]. The absence of

371 seasonal data in our study makes a direct inference of Arctic phylotype seasonality impossible,  
372 but Arctic summer/fall patterns can be compared to those described in other marine biomes. In  
373 contrast to summer samples from the BATS, phylotypes belonging to S1a and S1b were  
374 relatively scarce in the Arctic surface layer [4, 46], though P1a was abundant in most Arctic  
375 DCM samples., Brackish phylotype P3.2 was abundant in most Arctic surface water samples,  
376 which is an analogous distribution to phylotype P3.1 that blooms in BATS surface waters in the  
377 fall [46]. Whether the apparently more cold-tolerating P3.2 phylotype fills the same seasonal  
378 niche as P3.1 in tropical and temperate waters remains to be investigated. S2 phylotypes have  
379 been found year-round in deeper waters, but bloom specifically in the spring within the upper  
380 mesopelagic at BATS [4, 46], where they are likely involved in DOM remineralization following  
381 winter deep mixing [4]. In accordance with these findings, Arctic S2a MAGs were found to be  
382 abundant in the euphotic zones of several marine biomes, indicating that the MAGs' niche may  
383 be temporally, rather than spatially, defined. In agreement with previous work, we found the S2b  
384 reference genomes A6S6 and B3S13 to be highly abundant in the DCM and mesopelagic layer  
385 in the North Pacific, but absent in the Arctic Ocean. The absence of any S2b reference genome  
386 hits in the Arctic Ocean could point towards Arctic S2b-like MAGs (and the putatively  
387 corresponding P2.3s1 phylotype) replacing them as endemic Arctic specialists in the DCM and  
388 PWW, but, in the absence of seasonal samples, further work is needed to elucidate the  
389 seasonal patterns of Arctic ecotypes.

390 Different degrees of endemism within bacterial communities in the Arctic Ocean have  
391 been reported. Patterns vary for different groups of bacteria, but in general Arctic bacterial  
392 communities are complex assemblages of bacteria with cosmopolitan, bi-polar, and Arctic-  
393 specific distributions, indicating varying degrees of adaptation to local conditions. [6, 16, 17, 47–  
394 49]. In the present study, we set out to describe and place Arctic Ocean SAR11 into the global  
395 SAR11 biogeography using both marker gene and MAG-based approaches. Assembly of the  
396 highly genome-streamlined SAR11 clade, which shows high rates of recombination, from



397 metagenomes is difficult, complicating comparisons with 16S rRNA-based approaches.  
398 Nevertheless, we detected a previously nearly undescribed ITS phylotype, P2.3s1, which was  
399 the most common phylotype in most Arctic PWW and DCM samples. Moving from phylotypes to  
400 MAGs, we detected Arctic SAR11 genomes with restricted biogeographic distributions indicating  
401 the potential for bi-polar and endemic ecotypes. The selective forces shaping these  
402 biogeographic distributions as well as the resulting adaptive responses on the genome level  
403 merit future investigation.

404

#### 405 **Acknowledgements**

406 Data were collected aboard the CCGS Louis S. St-Laurent in collaboration with  
407 researchers from Fisheries and Oceans Canada at the Institute of Ocean Sciences and Woods  
408 Hole Oceanographic Institution's Beaufort Gyre Exploration Program and are available at  
409 <http://www.whoi.edu/beaufortgyre>. We would like to thank both the captain and crew of the  
410 CCGS Louis S. St-Laurent, the chief scientist, William J. Williams, and the scientific team  
411 aboard. The work was conducted in collaboration with the U.S. Department of Energy Joint  
412 Genome Institute, a DOE Office of Science User facility, and was supported under Contract No.  
413 DE-AC02-05CH11231. Funding Discovery grants (D.W. and C.L.). This study is also a  
414 contribution to ArcticNet, a Network of Centers of Excellence (Canada). The Canadian Natural  
415 Science and Engineering Research Council (NSERC) Discovery (C.L and D.W) and Northern  
416 Supplement (C.L), the Fonds de recherche du Québec Nature et Technologies (FRQNT)  
417 supporting Québec-Océan (C.L. D.W) and the Canada Research Chair Program (D.W.) are  
418 acknowledged.

419

#### 420 **Conflict of interest statement**

421 The authors declare no conflict of interest.

## 422 References

- 423 1. Morris RM, Rappé MS, Connon SA, Vergin KL, Siebold WA, Carlson CA, et al. SAR11  
424 clade dominates ocean surface bacterioplankton communities. *Nature* 2002; **420**: 806–  
425 810.
- 426 2. Brown M V, Lauro FM, DeMaere MZ, Muir L, Wilkins D, Thomas T, et al. Global  
427 biogeography of SAR11 marine bacteria. *Mol Syst Biol* 2012; **8**: 1–13.
- 428 3. Giovannoni SJ. SAR11 Bacteria: The Most Abundant Plankton in the Oceans. *Ann Rev*  
429 *Mar Sci* 2017; **9**: 231–255.
- 430 4. Carlson CA, Morris R, Parsons R, Treusch AH, Giovannoni SJ, Vergin K. Seasonal  
431 dynamics of SAR11 populations in the euphotic and mesopelagic zones of the  
432 northwestern Sargasso Sea. *ISME J* 2009; **3**: 283–95.
- 433 5. Ngugi DK, Stingl U. Combined Analyses of the ITS Loci and the Corresponding 16S  
434 rRNA Genes Reveal High Micro- and Macrodiversity of SAR11 Populations in the Red  
435 Sea. *PLoS One* 2012; **8**.
- 436 6. Pommier T, Pinhassi J, Hagström Å. Biogeographic analysis of ribosomal RNA clusters  
437 from marine bacterioplankton. *Aquat Microb Ecol* 2005; **41**: 79–89.
- 438 7. Tsementzi D, Wu J, Deutsch S, Nath S, Rodriguez-R LM, Burns AS, et al. SAR11  
439 bacteria linked to ocean anoxia and nitrogen loss. *Nature* 2016; **536**: 179–183.
- 440 8. García-Martínez J, Rodríguez-Valera F. Microdiversity of uncultured marine prokaryotes:  
441 The SAR11 cluster and the marine Archaea of Group I. *Mol Ecol* 2000; **9**: 935–948.
- 442 9. Herlemann DPR, Woelk J, Labrenz M, Jürgens K. Diversity and abundance of  
443 ‘Pelagibacterales’ (SAR11) in the Baltic Sea salinity gradient. *Syst Appl Microbiol* 2014;  
444 **37**: 601–604.
- 445 10. Oh HM, Kang I, Lee K, Jang Y, Lim S II, Cho JC. Complete genome sequence of strain  
446 IMCC9063, belonging to SAR11 subgroup 3, isolated from the Arctic Ocean. *J Bacteriol*  
447 2011; **193**: 3379–3380.

- 448 11. Bahr M, Hobbie JE, Sogin ML. Bacterial diversity in an arctic lake: A freshwater SAR11  
449 cluster. *Aquat Microb Ecol* 1996; **11**: 271–277.
- 450 12. McLaughlin FA, Carmack EC, Macdonald RW, Melling H, Swift JH, Wheeler PA, et al.  
451 The joint roles of Pacific and Atlantic-origin waters in the Canada Basin, 1997-1998.  
452 *Deep Res Part I Oceanogr Res Pap* 2004; **51**: 107–128.
- 453 13. Macdonald RW, McLaughlin FA, Carmack EC. Fresh water and its sources during the  
454 SHEBA drift in the Canada Basin of the Arctic Ocean. *Deep Res Part I Oceanogr Res*  
455 *Pap* 2002; **49**: 1769–1785.
- 456 14. Guéguen C, McLaughlin FA, Carmack EC, Itoh M, Narita H, Nishino S. The nature of  
457 colored dissolved organic matter in the southern Canada Basin and East Siberian Sea.  
458 *Deep Res Part II Top Stud Oceanogr* 2012; **81–84**: 102–113.
- 459 15. Pedrós-Alió C, Potvin M, Lovejoy C. Diversity of planktonic microorganisms in the Arctic  
460 Ocean. *Prog Oceanogr* 2015; **139**: 233–243.
- 461 16. Swan BK, Tupper B, Sczyrba A, Lauro FM, Martinez-Garcia M, Gonzalez JM, et al.  
462 Prevalent genome streamlining and latitudinal divergence of planktonic bacteria in the  
463 surface ocean. *Proc Natl Acad Sci* 2013; **110**: 11463–11468.
- 464 17. Ghiglione J-F, Galand PE, Pommier T, Pedros-Alio C, Maas EW, Bakker K, et al. Pole-to-  
465 pole biogeography of surface and deep marine bacterial communities. *Proc Natl Acad Sci*  
466 2012; **109**: 176330–17638.
- 467 18. Comeau AM, Li WKW, Tremblay JÉ, Carmack EC, Lovejoy C. Arctic ocean microbial  
468 community structure before and after the 2007 record sea ice minimum. *PLoS One* 2011;  
469 **6**.
- 470 19. Alonso-Sáez L, Sánchez O, Gasol JM, Balagué V, Pedrós-Alio C. Winter-to-summer  
471 changes in the composition and single-cell activity of near-surface Arctic prokaryotes.  
472 *Environ Microbiol* 2008; **10**: 2444–2454.
- 473 20. Shimada K, Itoh M, Nishino S, McLaughlin F, Carmack E, Proshutinsky A. Halocline

- 474 structure in the Canada Basin of the Arctic Ocean. *Geophys Res Lett* 2005; **32**.
- 475 21. Monier A, Comte J, Babin M, Forest A, Matsuoka A, Lovejoy C. Oceanographic structure  
476 drives the assembly processes of microbial eukaryotic communities. *ISME J* 2015; **9**:  
477 990–1002.
- 478 22. Colatriano D, Tran PQ, Guéguen C, Williams WJ, Lovejoy C, Walsh DA. Genomic  
479 evidence for the degradation of terrestrial organic matter by pelagic Arctic Ocean  
480 Chloroflexi bacteria. *Commun Biol* 2018; **1**.
- 481 23. Kang DD, Froula J, Egan R, Wang Z. MetaBAT, an efficient tool for accurately  
482 reconstructing single genomes from complex microbial communities. *PeerJ* 2015; **3**.
- 483 24. Bushnell B. BBMap: a fast, accurate, splice-aware aligner. *Joint Genome Institute,*  
484 *department of energy* . 2014.
- 485 25. Parks DH, Imelfort M, Skennerton CT, Hugenholtz P, Tyson GW. CheckM: Assessing the  
486 quality of microbial genomes recovered from isolates, single cells, and metagenomes.  
487 *Genome Res* 2015; **25**: 1043–1055.
- 488 26. Lechner M, Findeiß S, Steiner L, Marz M, Stadler PF, Prohaska SJ. Proteinortho:  
489 Detection of (Co-)orthologs in large-scale analysis. *BMC Bioinformatics* 2011; **12**.
- 490 27. Kumar S, Stecher G, Peterson D, Tamura K. MEGA-CC: Computing core of molecular  
491 evolutionary genetics analysis program for automated and iterative data analysis.  
492 *Bioinformatics* 2012; **28**: 2685–2686.
- 493 28. Huntemann M, Ivanova NN, Mavromatis K, Tripp HJ, Paez-Espino D, Tennessen K, et al.  
494 The standard operating procedure of the DOE-JGI Metagenome Annotation Pipeline  
495 (MAP v.4). *Stand Genomic Sci* 2016; **11**.
- 496 29. Bairoch A, Apweiler R. The SWISS-PROT protein sequence data bank and its  
497 supplement TrEMBL in 1999. *Nucleic Acids Res* 1999; **27**: 49–54.
- 498 30. Landry Z, Swa BK, Herndl GJ, Stepanauskas R, Giovannoni SJ. SAR202 genomes from  
499 the dark ocean predict pathways for the oxidation of recalcitrant dissolved organic matter.

- 500 *MBio* 2017; **8**.
- 501 31. Karsenti E, Acinas SG, Bork P, Bowler C, de Vargas C, Raes J, et al. A holistic approach  
502 to marine Eco-systems biology. *PLoS Biol* 2011; **9**.
- 503 32. Delmont TO, Quince C, Shaiber A, Esen OC, Lee STM, Lucker S, et al. Nitrogen-Fixing  
504 Populations Of Planctomycetes And Proteobacteria Are Abundant In Surface Ocean  
505 Metagenomes. *Nat Rev Microbiol* 2018; **3**: 804–813.
- 506 33. Oksanen J, Blanchet FG, Friendly M, Kindt R, Legendre P, Mcglinn D, et al. Vegan:  
507 Community Ecology Package. URL <https://cran.r-project.org>,  
508 <https://github.com/vegandevs/vegan> 2016.
- 509 34. Tran P, Ramachandran A, Khawasik O, Beisner BE, Rautio M, Huot Y, et al. Microbial life  
510 under ice: Metagenome diversity and in situ activity of Verrucomicrobia in seasonally ice-  
511 covered Lakes. *Environ Microbiol* 2018; **20**: 2568–2584.
- 512 35. Bano N, Hollibaugh JT. Phylogenetic composition of bacterioplankton assemblages from  
513 the Arctic Ocean. *Appl Environ Microbiol* 2002; **68**: 505–518.
- 514 36. Kirchman DL, Cottrell MT, Lovejoy C. The structure of bacterial communities in the  
515 western Arctic Ocean as revealed by pyrosequencing of 16S rRNA genes. *Environ*  
516 *Microbiol* 2010; **12**: 1132–1143.
- 517 37. Galand PE, Potvin M, Casamayor EO, Lovejoy C. Hydrography shapes bacterial  
518 biogeography of the deep Arctic Ocean. *ISME J* 2010; **4**: 564–576.
- 519 38. Cameron TJ, Temperton B, Swan BK, Landry ZC, Woyke T, Delong EF, et al. Single-cell  
520 enabled comparative genomics of a deep ocean SAR11 bathytype. *ISME J* 2014; **8**:  
521 1440–1451.
- 522 39. Grote J, Thrash JC, Huggett MJ. Streamlining and Core Genome Conservation among  
523 Highly Divergent Members of the SAR11 Clade. 2012; **3**: 1–13.
- 524 40. Schwalbach MS, Tripp HJ, Steindler L, Smith DP, Giovannoni SJ. The presence of the  
525 glycolysis operon in SAR11 genomes is positively correlated with ocean productivity.

- 526 *Environ Microbiol* 2010; **12**: 490–500.
- 527 41. Viklund J, Ettema TJG, Andersson SGE. Independent genome reduction and  
528 phylogenetic reclassification of the oceanic SAR11 clade. *Mol Biol Evol* 2012; **29**: 599–  
529 615.
- 530 42. Delmont TO, Kiefl E, Kilinc O, Esen OC, Uysal I, Rappe MS, et al. The global  
531 biogeography of amino acid variants within a single SAR11 population is governed by  
532 natural selection. *bioRxiv* 2017.
- 533 43. Kirkpatrick M, Barton NH. Evolution of a Species' Range. *Am Nat* 1997; **150**: 1–23.
- 534 44. Hellweger FL, Van Sebille E, Fredrick ND. Biogeographic patterns in ocean microbes  
535 emerge in a neutral agent-based model. *Science* 2014; **345**: 1246–1349.
- 536 45. Eren AM, Maignien L, Sul WJ, Murphy LG, Grim SL, Morrison HG, et al. Oligotyping:  
537 Differentiating between closely related microbial taxa using 16S rRNA gene data.  
538 *Methods Ecol Evol* 2013; **4**.
- 539 46. Vergin KL, Beszteri B, Monier A, Cameron Thrash J, Temperton B, Treusch AH, et al.  
540 High-resolution SAR11 ecotype dynamics at the Bermuda Atlantic Time-series Study site  
541 by phylogenetic placement of pyrosequences. *ISME J* 2013; **7**: 1322–1332.
- 542 47. Barton AD, Dutkiewicz S, Flierl G, Bragg J, Follows MJ. Patterns of diversity in marine  
543 phytoplankton. *Science (80- )* 2010; **327**: 1509–1511.
- 544 48. Thomas MK, Kremer CT, Klausmeier CA, Litchman E. A global pattern of thermal  
545 adaptation in marine phytoplankton. *Science (80- )* 2012; **338**: 1085–1088.
- 546 49. Ladau J, Sharpton TJ, Finucane MM, Jospin G, Kembel SW, O'Dwyer J, et al. Global  
547 marine bacterial diversity peaks at high latitudes in winter. *ISME J* 2013; **7**: 1669–1677.
- 548 50. Tully BJ, Graham ED, Heidelberg JF. The reconstruction of 2,631 draft metagenome-  
549 assembled genomes from the global oceans. *Sci Data* 2018; **5**.
- 550 51. Cabello-Yeves PJ, Zemskay TI, Rosselli R, Coutinho FH, Zakharenko AS, Blinov V V., et  
551 al. Genomes of novel microbial lineages assembled from the sub-ice waters of Lake

552           Baikal. *Appl Environ Microbiol* 2018; **84**.

553   52.   Morris RM, Vergin KL, Cho JC, Rappé MS, Carlson CA, Giovannoni SJ. Temporal and  
554       spatial response of bacterioplankton lineages to annual convective overturn at the  
555       Bermuda Atlantic Time-series Study site. *Limnol Oceanogr* 2005; **50**: 1687–1696.

556   53.   Jimenez-Infante F, Ngugi DK, Vinu M, Blom J, Alam I, Bajic VB, et al. Genomic  
557       characterization of two novel SAR11 isolates from the Red Sea, including the first strain  
558       of the SAR11 Ib clade. *FEMS Microbiol Ecol* 2017; **93**.

559

## 560   **Tables**

561   Table 1: SAR11 clades, subclades and phylotypes, as well as their environmental associations  
562       as described in the literature.

563

564   Table 2: Western Arctic Ocean metagenome sampling sites, their environmental feature and  
565       environmental parameters including sampling depth (Depth), water temperature (Temp.),  
566       Salinity, Chl a Fluorescence, CDOM, Oxygen and Nitrate (NO<sub>3</sub>).

567

568   Table 3: Summary statistics of MAGs from the Western Arctic Ocean.

569

## 570   **Figure legends**

571   Figure 1: Study metadata and overview of SAR11 ITS phylogeny. A) Sampling locations of the  
572       Western Arctic Ocean metagenomes. B) Environmental profiles of sampling locations showing  
573       temperature (°C), salinity, chlorophyll a fluorescence (mg m<sup>-3</sup>) and nitrate (mmol m<sup>-3</sup>). C)  
574       Maximum likelihood ITS phylogeny including Arctic and reference sequences. Only subclades  
575       which contain Arctic ITS sequence types are labeled.

576

577 Figure 2: Distribution of SAR11 phylotypes in the Arctic Ocean. A) ITS region coverage of Arctic  
578 SAR11 phylotypes across samples. B) Principal coordinate analysis ordination of Bray-Curtis  
579 dissimilarities of Arctic samples based on the coverage of different ITS phylotypes. Scaling 2 is  
580 shown. Dark blue diamonds: PWW samples, blue diamonds: SCM samples, light blue samples:  
581 surface samples. Asterisks show phylotypes' weighted average frequency.

582

583 Figure 3: Phylogenetic context and distribution of Arctic SAR11 MAGs. A) Maximum likelihood  
584 phylogeny based on 39 concatenated orthologous loci. Only bootstrap values higher than 0.6  
585 are shown on the tree. Colored squares and circles at the tips indicate the environment and  
586 temperature of origin (if known), matching phylotypes if known are indicated. Colored squares  
587 indicate reference genomes with known ITS phylotypes. Grey labeling indicates inferred  
588 phylotypes based on phylogenetic placement and distribution of the genomes. B) Coverage of  
589 Arctic MAG scaffolds across Western Arctic ocean metagenomes.

590

591 Figure 4: Global biogeography of SAR11 genomes. A) RPMG table of Arctic MAGs and  
592 reference genomes by ocean layer and ocean region. Abbreviations for oceans are Arctic (AO),  
593 Southern (SO), South Pacific (SP), North Pacific (NP), South Atlantic (SA), North Atlantic (NA),  
594 Indian Ocean (IO), Mediterranean (MS) and Red (RS) Seas. For clarity only RPMG values > 3  
595 are shown in the figure. We also performed fragment recruitment for five LD12 genomes, but  
596 observed no recruitment across all metagenomic datasets. B) Principal coordinate analysis  
597 ordination of Bray-Curtis dissimilarities of metagenome samples based on RPMG values of  
598 arctic MAGs and reference genomes. Scaling 2 is shown. Arrows indicate significant  
599 environmental variables after *Post-Hoc* testing. Asterisks show the weighted average of each  
600 genomes' frequency.

601



602 Supplementary Information: Supplementary methods description (docx).

603

604 Supplemental Figure 1: ITS phylogeny of SAR11 subclades. The longest sequence type per  
605 Arctic cluster was used in the phylogeny and only sequence types containing complete ITS  
606 regions are included. Arctic samples are indicated by coloured squares; Surface (green), DCM  
607 (orange) and PWW (blue), Subclades from Table 1: A) S1a, B) S1b, C) S2 and D) S3 (pdf).

608

609 Supplemental Figure 2: Principal coordinate analysis ordination of Bray-Curtis dissimilarities of  
610 metagenome samples based on RPMG values of arctic MAGs and reference genomes,  
611 including SAR11 MAGs from the TARA ocean circumnavigation expedition [50]. Scaling 2 is  
612 shown. Arrows indicate significant environmental variables after *Post-Hoc* testing. Asterisks  
613 show the weighted average of each genomes' frequency (pdf).

614

Table 1: SAR11 clades, subclades and phylotypes, as well as their environmental associations as described in the literature (SS: Sargasso Sea).

| Clade (16S rRNA) | Subclade (16S rRNA) | Phylotype (ITS) | Reference genome available? | Environmental description                       |                                                                     |                                             |
|------------------|---------------------|-----------------|-----------------------------|-------------------------------------------------|---------------------------------------------------------------------|---------------------------------------------|
|                  |                     |                 |                             | Clade                                           | Subclade                                                            | Phylotype                                   |
| S1               | S1a                 | P1a.1           | Y                           | -Freshwater Lake Baikal [51]                    | -Summer SS bloom in surface [46]                                    | -Cold [2]                                   |
|                  |                     | P1a.2           | N                           | -Blooms in summer in surface SS [46]            | -Bloom in summer mixed layer of SS (high UV, low nutrients) [4, 52] | -Blooms December to June in coastal NA [45] |
|                  |                     | P1a.3           | Y                           |                                                 | -SS euphotic zone, blooms after mixing [4]                          | -Temperate [2]                              |
|                  | S1b                 | P1b.1           | Y                           |                                                 |                                                                     | -Tropical [2]                               |
|                  |                     | P1b.2           | Y                           |                                                 |                                                                     | -Tropical, depth generalist [5]             |
|                  |                     | P1b.3           | Y                           |                                                 |                                                                     | -Blooms July to November in coastal NA [45] |
|                  | S1c                 | NA2             | Y                           |                                                 | -Tropical, oxygen generalist [7]                                    |                                             |
|                  |                     |                 |                             |                                                 | -SS spring bloom [46]                                               | -Tropical, upper euphotic layer [5]         |
|                  |                     |                 |                             |                                                 | -Tropical, epi- and bathypelagic [53]                               |                                             |
|                  |                     |                 |                             |                                                 | -Tropical [2]                                                       |                                             |
|                  |                     |                 |                             | -Deep, tropical [5, 7]                          |                                                                     |                                             |
|                  |                     |                 |                             | -Deep SS [46]                                   |                                                                     |                                             |
| S2               | S2a.a               | -               | Y                           | -Blooms in mesopelagic NA after deep mixing [4] | -SS spring bloom [46]                                               | -OMZ specialist, tropical [7]               |
|                  | S2a.b               | P2.1            | Y                           |                                                 |                                                                     | -Tropical [2]                               |
|                  |                     | P2.2            | N                           |                                                 |                                                                     | -Cold [2]                                   |
|                  | S2b                 | P2.3            | Y                           |                                                 |                                                                     | -Antarctic [8]                              |
|                  |                     |                 |                             | -Deep SS [46]                                   | -Cold [2]                                                           |                                             |
|                  |                     |                 |                             |                                                 | -Deep, tropical [5]                                                 |                                             |
|                  |                     |                 |                             |                                                 | -Tropical, OMZ [7]                                                  |                                             |
|                  |                     |                 |                             |                                                 | -P2.3s1: Arctic SCM and PWW (this study)                            |                                             |
| S3               |                     | P3.1            | Y                           |                                                 |                                                                     | -SS surface in autumn [46]                  |
|                  |                     |                 |                             |                                                 |                                                                     | -Coastal, mesohaline,                       |

|  |  |      |   |  |  |                                                 |
|--|--|------|---|--|--|-------------------------------------------------|
|  |  |      |   |  |  | surface [9]<br>-Tropical [2]                    |
|  |  | P3.2 | Y |  |  | -Arctic [10]<br>-Brackish [9]<br>-Temperate [2] |
|  |  | LD12 | Y |  |  | -Freshwater [11]                                |

Table 2: Western Arctic Ocean metagenome sampling sites, their environmental feature and environmental parameters including sampling depth (Depth), water temperature (Temp.), Salinity, Chl a Fluorescence, CDOM, Oxygen and Nitrate (NO<sub>3</sub>) limit of detection 0.02 (nd)

| Station | Lat.  | Long.   | Feature | Depth [m] | Temp. [°C] | Salinity | Fluorescence [mg m <sup>-3</sup> ] | CDOM [mg m <sup>-3</sup> ] | Oxygen [mmol m <sup>-3</sup> ] | NO <sub>3</sub> [mmol m <sup>-3</sup> ] |
|---------|-------|---------|---------|-----------|------------|----------|------------------------------------|----------------------------|--------------------------------|-----------------------------------------|
| CB2_154 | 73.22 | -150.22 | SUR     | 7         | -1.26      | 25.70    | 0.15                               | 2.54                       | 391.85                         | nd                                      |
| CB2_152 | 73.22 | -150.22 | DCM     | 67        | -0.86      | 31.48    | 0.33                               | 3.9                        | 351.56                         | 4.45                                    |
| CB2_150 | 73.22 | -150.22 | PWW     | 177       | -1.45      | 33.18    | 0.05                               | 4.21                       | 281.85                         | 15.98                                   |
| CB4_138 | 75.26 | -150.07 | SUR     | 5         | -1.39      | 26.14    | 0.12                               | 2.58                       | 394.08                         | nd                                      |
| CB4_136 | 75.26 | -150.07 | DCM     | 79        | -0.02      | 31.16    | 0.23                               | 3.9                        | 329.14                         | 4.65                                    |
| CB4_134 | 75.26 | -150.07 | PWW     | 208       | -1.47      | 33.14    | 0.05                               | 4.36                       | 282.39                         | 16.13                                   |
| CB8_130 | 77.1  | -150.23 | SUR     | 5         | -1.46      | 27.2     | 0.19                               | 2.78                       | 395.60                         | nd                                      |
| CB8_128 | 77.1  | -150.23 | DCM     | 58        | -0.15      | 30.97    | 0.30                               | 3.89                       | 383.72                         | 0.35                                    |
| CB8_126 | 77.1  | -150.23 | PWW     | 213       | -1.45      | 33.14    | 0.05                               | 4.42                       | 281.09                         | 16.24                                   |
| CB11_90 | 79.25 | -150.06 | SUR     | 5         | -1.48      | 27.31    | 0.24                               | 2.67                       | 394.88                         | nd                                      |
| CB11_88 | 79.25 | -150.06 | DCM     | 25        | -1.04      | 29.69    | 0.25                               | 3.22                       | 401.18                         | nd                                      |
| CB11_86 | 79.25 | -150.06 | PWW     | 190       | -1.46      | 33.15    | 0.05                               | 4.35                       | 281.89                         | 15.82                                   |

Table 3: Summary statistics of MAGs from the Western Arctic Ocean.

| <b>Subclade</b> | <b>MAG</b> | <b>Size (mb)</b> | <b>Cov (x)</b> | <b>GC (%)</b> | <b>Completeness (%)</b> | <b>Contamination (%)</b> | <b>N50 (kb)</b> | <b># of scaffolds</b> | <b># of genes</b> | <b># of unique genes</b> |
|-----------------|------------|------------------|----------------|---------------|-------------------------|--------------------------|-----------------|-----------------------|-------------------|--------------------------|
| S1a             | 312        | 0.42             | 27.83          | 27.3          | 47.17                   | 1.89                     | 21.23           | 20                    | 462               | 33                       |
| S2a             | 112        | 0.41             | 8.66           | 28.31         | 38.68                   | 1.89                     | 18.76           | 20                    | 462               | 49                       |
| S2a             | 272        | 0.3              | 17.96          | 29.52         | 35.85                   | 0                        | 98.98           | 5                     | 320               | 10                       |
| S2a             | 410        | 0.42             | 16.77          | 30.68         | 24.53                   | 1.89                     | 18.96           | 26                    | 462               | 36                       |
| S2a             | 484        | 0.44             | 38.18          | 28.54         | 35.09                   | 0                        | 38.17           | 14                    | 481               | 35                       |
| S2              | 144        | 0.63             | 27.78          | 29.21         | 41.51                   | 3.77                     | 30.34           | 23                    | 672               | 47                       |
| S2              | 196        | 0.39             | 23.43          | 28.5          | 46.99                   | 0                        | 93.24           | 8                     | 430               | 29                       |

A

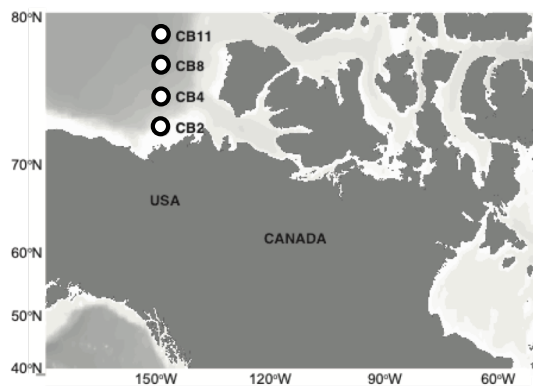

B

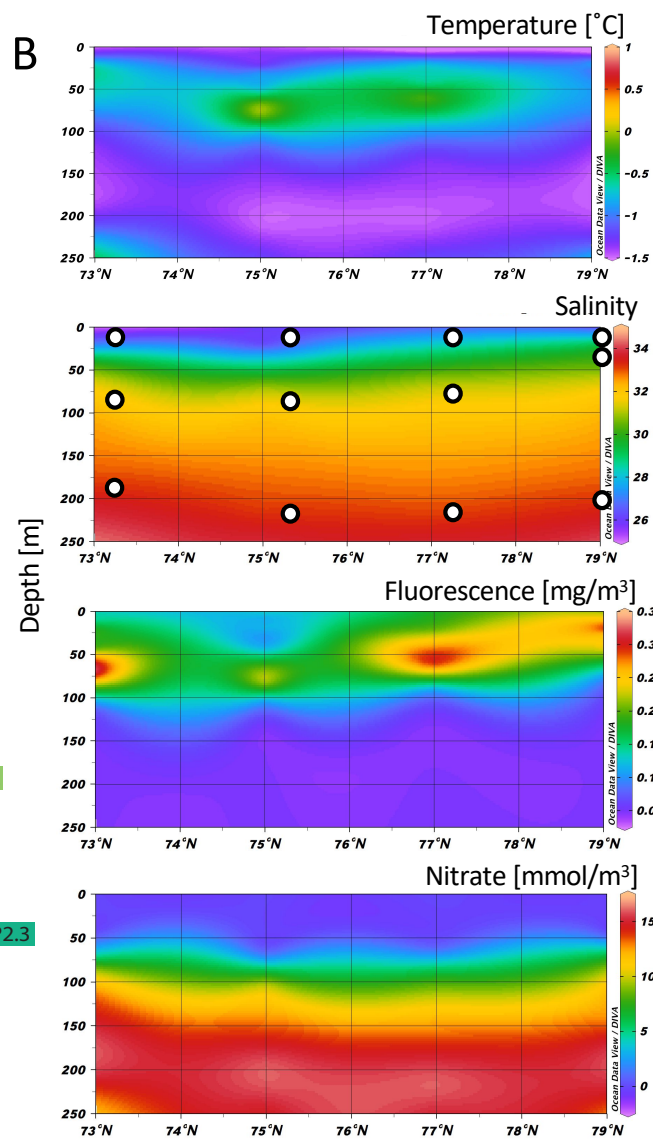

C

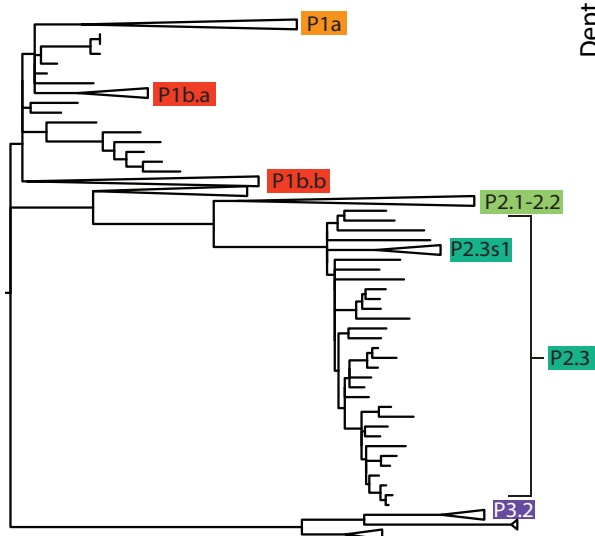

A

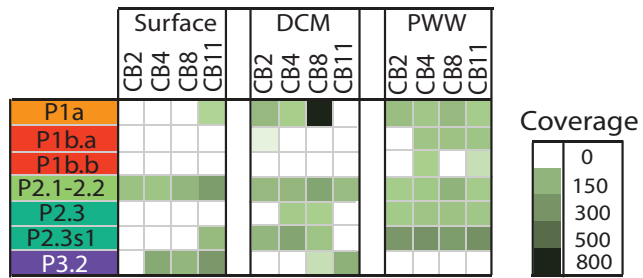

B

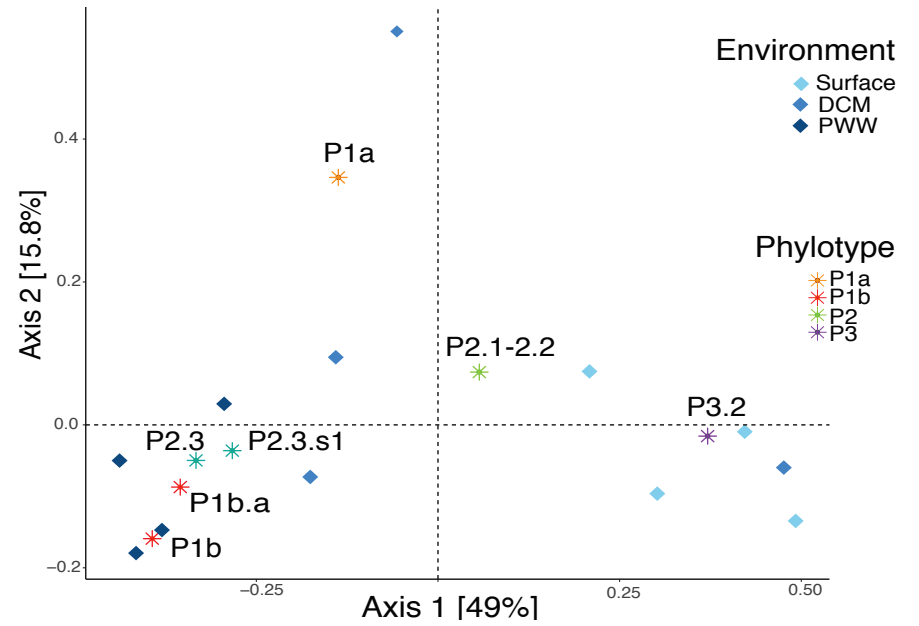

**A**

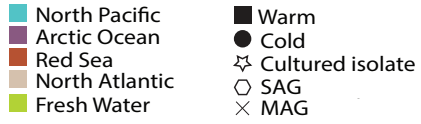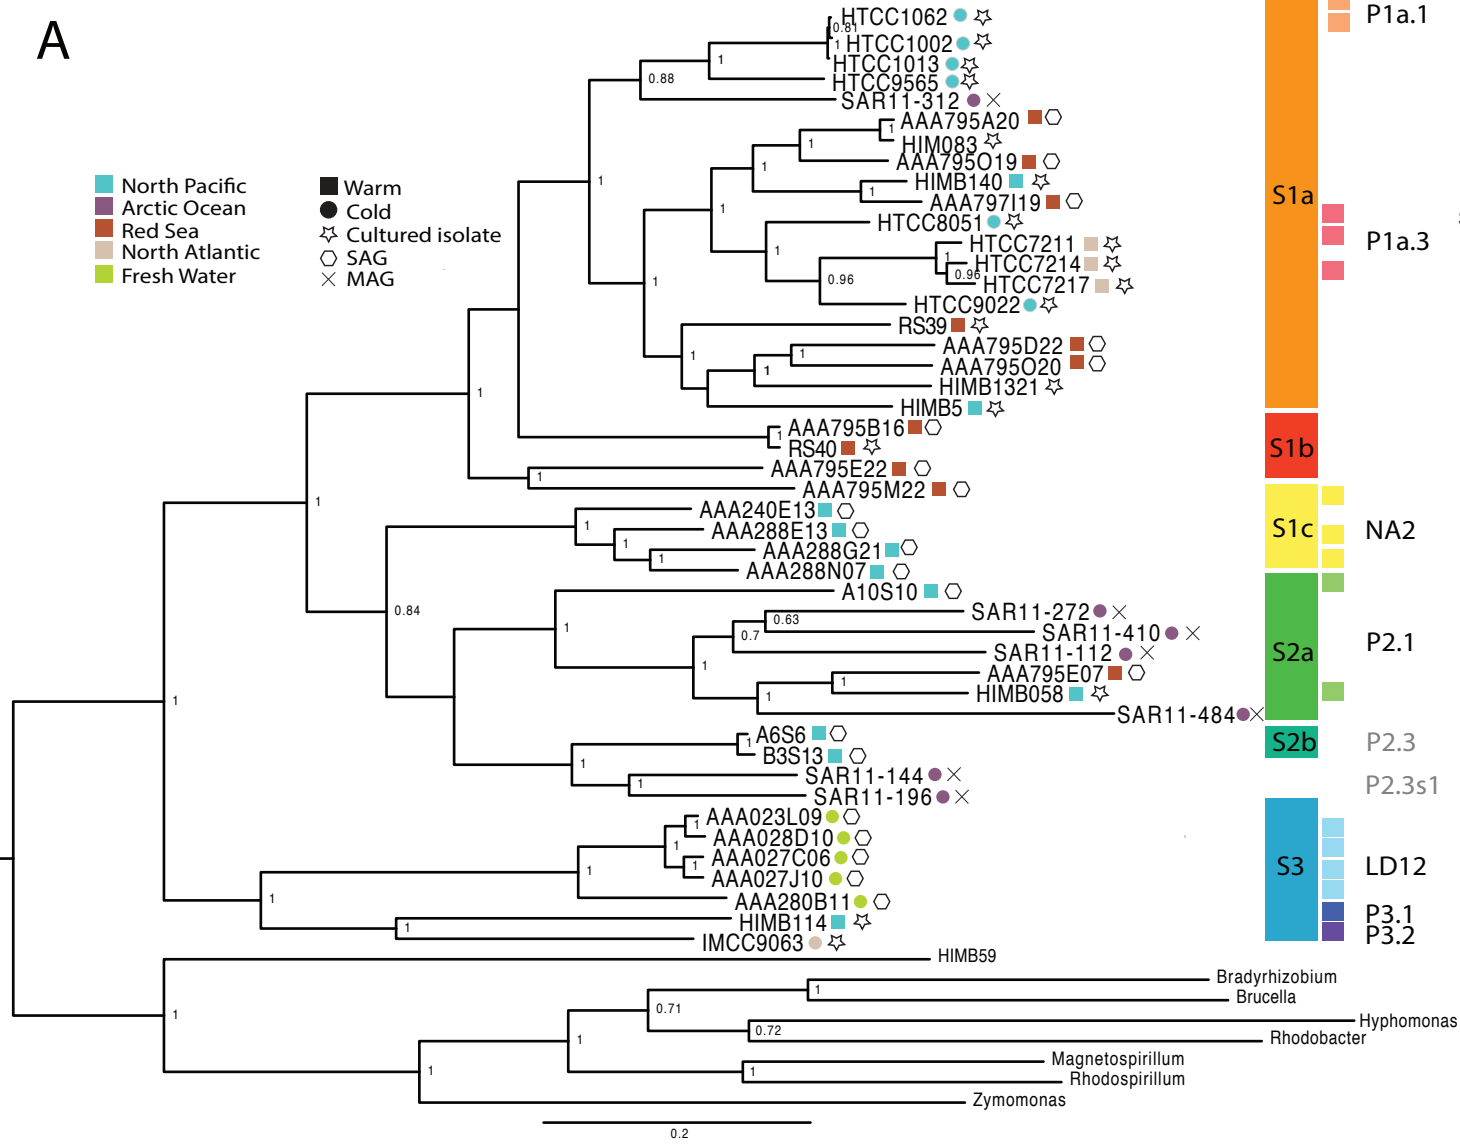

**B**

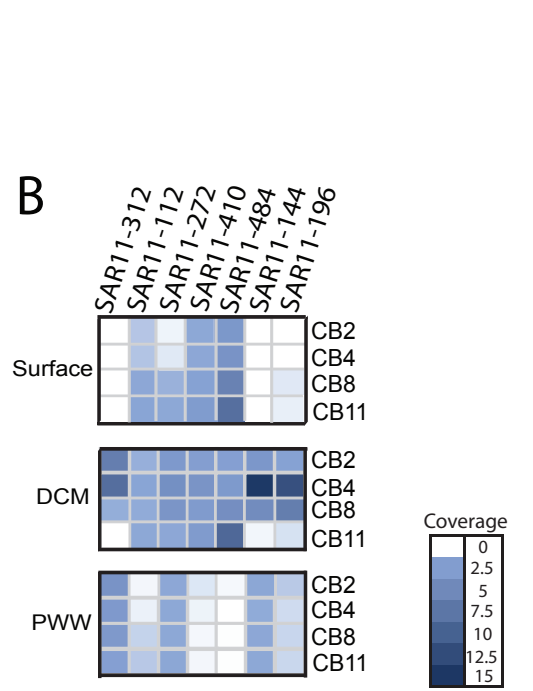

A

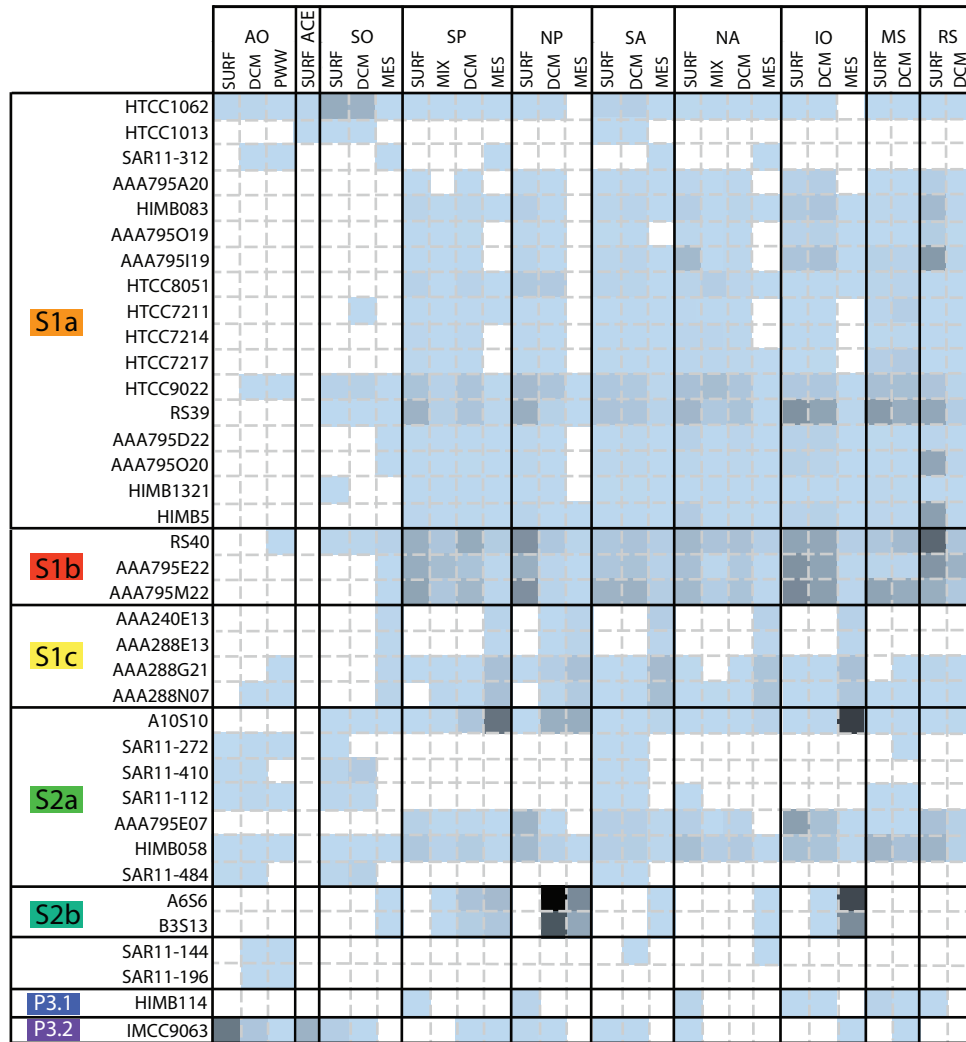

B

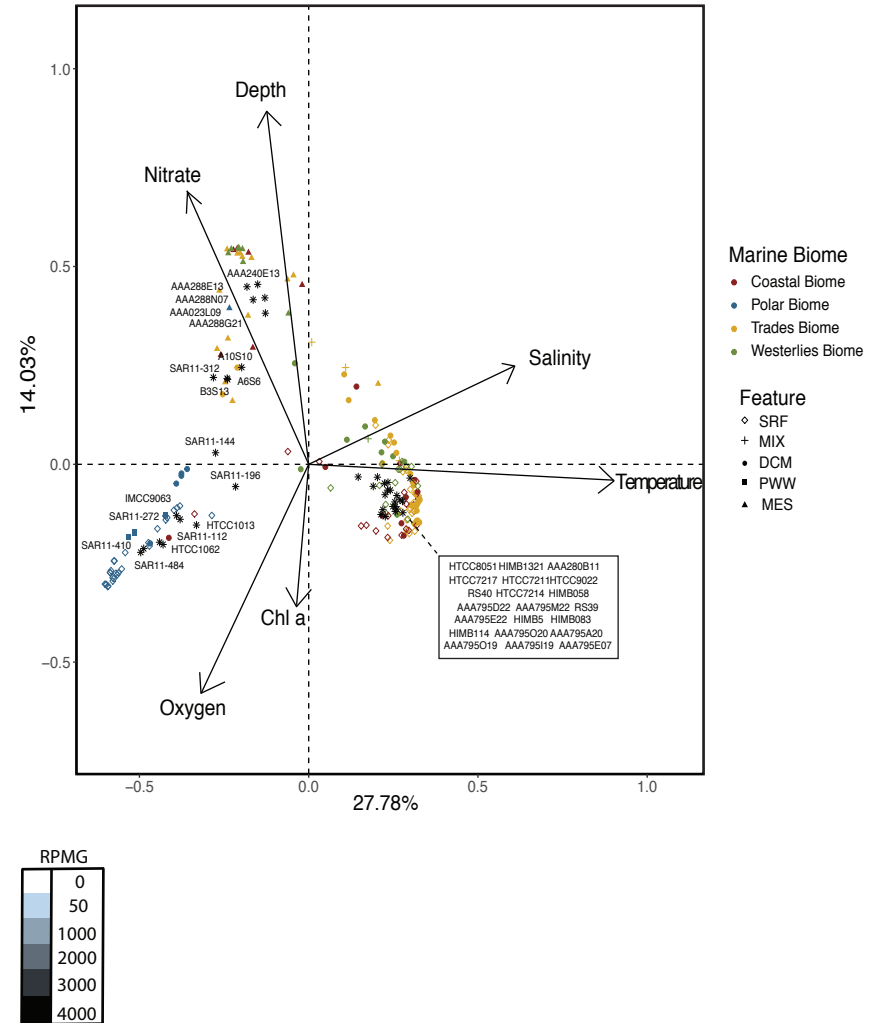

Source: http://biorxiv.org/content/10.1101/517433v2.full.pdf
